# Supplementary material for: Comprehensive Library Generation for Identification and Quantification of Endometrial Cancer Protein Biomarkers in Cervico-Vaginal Fluid
Source: MDPI journal article supplement (doi:10.3390/cancers13153804), 2021-07-28
Supplement: s1 [file s1]

Supplementary data

**Figure S1:** Intensity correlation coefficients of replicates of the 10 vaginal fluid samples used for clinical validation.

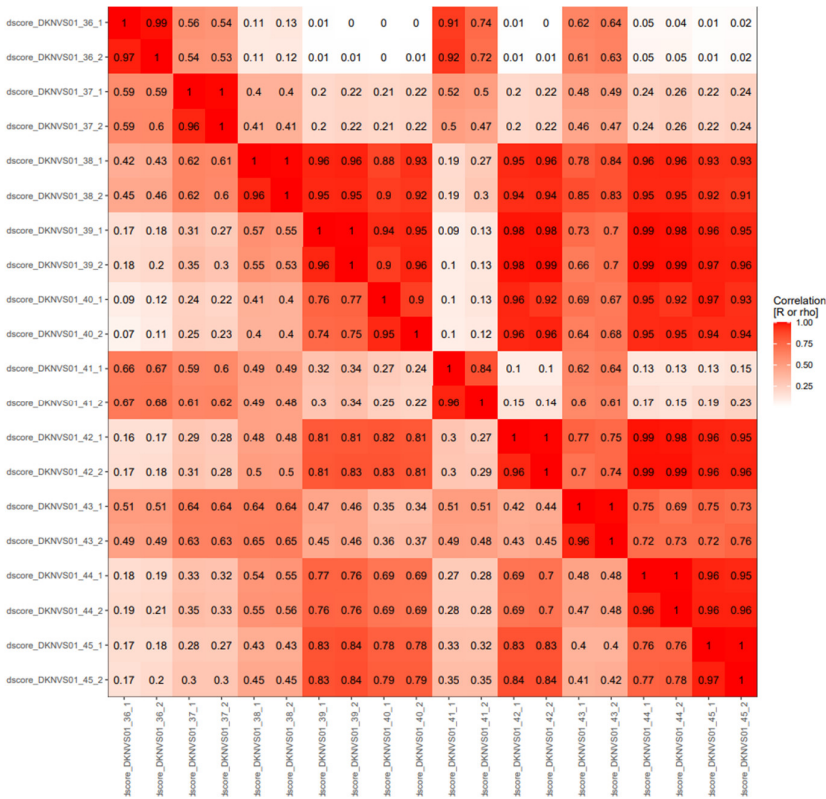

**Figure S2:** Coefficient of variations of transition intensities between replicates

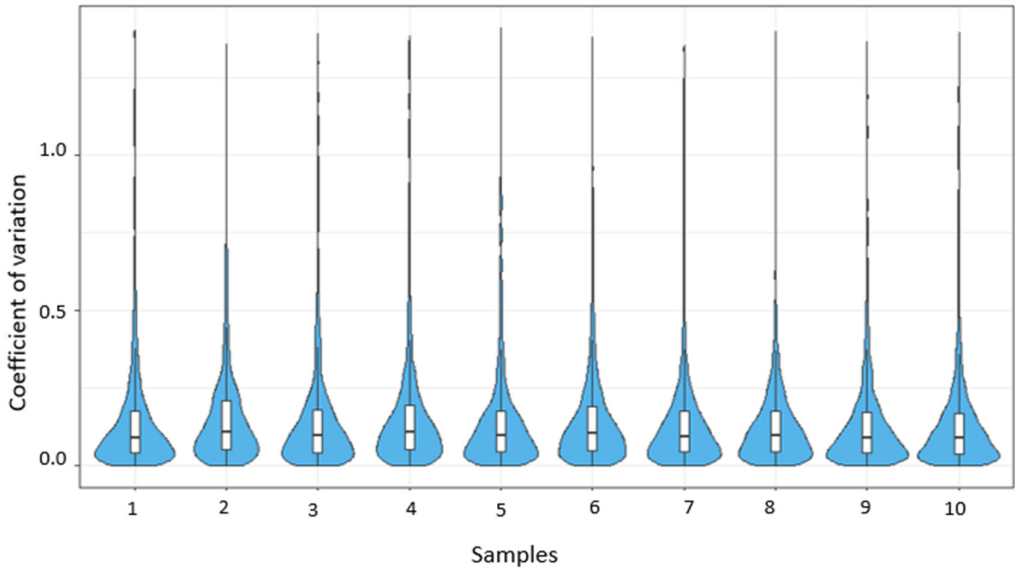

**Figure S3: Gene ontology analyses of cervico-vaginal fluid proteins from the validation cohort used in generating the PCA and TSNE plots**

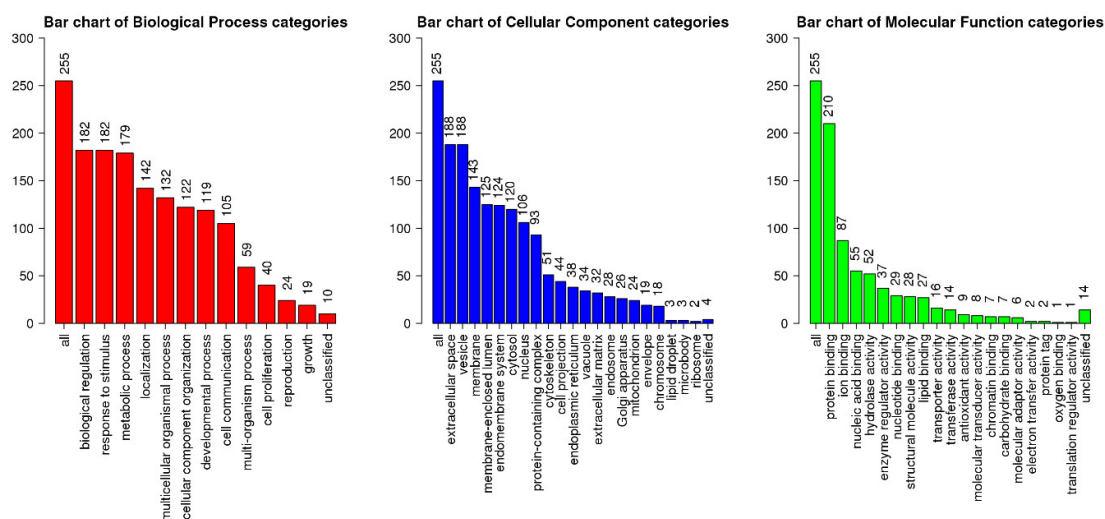

**Table S1: Gene names of proteins unique to our cervico-vaginal fluid consensus spectral library compared to the pan-human library.**

| Gene names |
|------------|
| ALPG       |
| FAM43A     |
| SOX11      |
| TMPRSS11B  |
| H2AC11     |
| RNF121     |
| MYL12B     |
| CRNN       |
| CDH23      |
| TMPRSS11D  |
| SERPINB13  |
| DSG3       |
| MMP7       |
| ZSCAN22    |
| SPINK5     |
| ZNF716     |
| ZNF7       |
| ZNF250     |
| ZNF30      |
| ZBTB17     |
| ZNF35      |
| H2AC4      |
| CAPNS2     |
| VSIG10L    |
| SPRR3      |
| RPS17      |
| ZBTB5      |
| CYSRT1     |

|           |
|-----------|
| TGM5      |
| DLX4      |
| RPTN      |
| YIPF2     |
| IGKV1-33  |
| IGKV1-5   |
| IGKV3-20  |
| IGKV3-20  |
| IGKV1-5   |
| IGKV1-33  |
| MUC21     |
| GBP6      |
| TUBA1B    |
| SPRR1A    |
| CLDN4     |
| EMP1      |
| ACTA2     |
| TMPRSS6   |
| NKX3-2    |
| POU3F3    |
| PAX2      |
| ENDOU     |
| ZBTB7C    |
| PHOX2A    |
| ACTC1     |
| IGKV2D-28 |
| KRT74     |
| ZNF197    |
| IGLV1-47  |
| OBSCN     |
| KLK13     |
| KLK11     |
| HOXB7     |
| MAB21L4   |
| RNASE7    |
| ALPP      |
| SKIL      |
| TBX21     |
| ACTG2     |
| CPXCR1    |
| MZF1      |
| POTEE     |
| IGKV3-15  |
| LYPD2     |
| SPRR1B    |
| DUXA      |
| IGHV3-23  |
| IGHV3-30  |
| HDX       |
| TCP11L2   |
| TMPRSS11A |
| UBB       |
| ZSCAN5B   |
| ZNF771    |
| OSR2      |

|           |
|-----------|
| CYP4F22   |
| ZNF256    |
| ALX4      |
| ZNF438    |
| TMPRSS11E |
| AIG1      |
| SALL1     |
| ZBTB40    |
| PRR4      |
| MYPOP     |
| ZNF860    |
| AMY1A     |
| H2BC12    |
| ALOX15B   |
| H2AC18    |
| ZFP92     |
| IGKV4-1   |
| PRSS27    |
| DMKN      |
| NME2P1    |
| NPEPPSL1  |
| MDK       |
| DBX1      |
| MMP25     |
| CRCT1     |
| ZNF652    |
| ZNF550    |
| PLA2G4D   |
| TP73      |
| ZNF500    |
| ZNF407    |
| BPIFB2    |
| BHLHA9    |
| SETBP1    |
| IGKV3-20  |
| TPRG1     |
| CRYGS     |
| DLX3      |
| HOXC6     |
| S100A7A   |
| SPRR2A    |
| H2BC18    |
| SPRR2D    |
| ZFPM1     |
| GBP7      |
| KLK5      |
| MYC       |
| IGKV1D-33 |
| ASB15     |
| MKX       |
| IGHV3-13  |
| TBX20     |
| KRT72     |
| N4BP2L1   |
| IL36A     |

|           |
|-----------|
| DNAH7     |
| ZNF610    |
| SP5       |
| NR1D2     |
| IGLC1     |
| ZNF233    |
| ZNF333    |
| HIC2      |
| THAP3     |
| ANXA8     |
| HAPLN3    |
| IGLV1-51  |
| IGLV1-40  |
| IGLV1-47  |
| FABP5P3   |
| ZC3H3     |
| IGHV3-33  |
| IGHV1-69  |
| IGHV1-46  |
| IGHV1-69  |
| IGHV3-11  |
| IGHV3-30  |
| ANXA2P2   |
| HOXC4     |
| H2AC6     |
| IGLV3-1   |
| MAPK1IP1L |
| EVX1      |
| ZFP2      |
| PRDM6     |
| TSHZ3     |
| TSHZ2     |
| ZNF354C   |
| TCF24     |
| ZNF804B   |
| ZNF350    |
| KLF7      |
| LY6D      |
| RHOD      |
| EBF3      |
| ZNF777    |
| KLK10     |
| FAM25A    |
| IGKV4-1   |
| PAX7      |
| STS       |
| DLX6      |
| RXRG      |
| MAL       |
| PROM2     |
| GLI3      |
| CA6       |
| THRA      |
| CREB3L2   |
| CLDN1     |

|          |
|----------|
| ZFPM2    |
| KRT12    |
| MALL     |
| FAM83A   |
| IGKV1-17 |
| IGLV3-1  |
| MYOD1    |
| FOXN1    |

**Table S2:** List of proteins detected in the cervico-vaginal fluid of the validation cohort

| ID     | Gene name |
|--------|-----------|--------|-----------|--------|-----------|--------|-----------|
| A8K2U0 | A2ML1     | P07384 | CAN1      | P35659 | DEK       | Q6E0U4 | DMKN      |
| O00151 | PDL1      | P07437 | TBB5      | P35858 | ALS       | Q6FI13 | H2A2A     |
| O00160 | MYO1F     | P07476 | INVO      | P35908 | K22E      | Q6KB66 | K2C80     |
| O00231 | PSD11     | P07737 | PROF1     | P36222 | CH3L1     | Q6P4A8 | PLBL1     |
| O00299 | CLIC1     | P07814 | SYEP      | P36578 | RL4       | Q6UWP8 | SBSN      |
| O00391 | QSOX1     | P07858 | CATB      | P36952 | SPB5      | Q6UX06 | OLFM4     |
| O00505 | IMA4      | P07900 | HS90A     | P36955 | PEDF      | Q6UXB3 | LYPD2     |
| O00515 | LAD1      | P08107 | HSP71     | P37108 | SRP14     | Q6WKZ4 | RFIP1     |
| O14745 | NHRF1     | P08133 | ANXA6     | P37802 | TAGL2     | Q6XPR3 | RPTN      |
| O14791 | APOL1     | P08185 | CBG       | P37837 | TALDO     | Q6ZMR5 | TM11A     |
| O14818 | PSA7      | P08246 | ELNE      | P38159 | RBMX      | Q6ZN66 | GBP6      |
| O14880 | MGST3     | P08311 | CATG      | P38646 | GRP75     | Q6ZVX7 | FBX50     |
| O15144 | ARPC2     | P08519 | APOA      | P39023 | RL3       | Q7Z406 | MYH14     |
| O15231 | ZN185     | P08603 | CFAH      | P40121 | CAPG      | Q7Z4W1 | DCXR      |
| O15400 | STX7      | P08670 | VIME      | P40199 | CEAM6     | Q7Z794 | K2C1B     |
| O15511 | ARPC5     | P08697 | A2AP      | P40925 | MDHC      | Q86T26 | TM11B     |
| O43175 | SERA      | P08727 | K1C19     | P40926 | MDHM      | Q86U42 | PABP2     |
| O43240 | KLK10     | P08729 | K2C7      | P40939 | ECHA      | Q86V81 | THOC4     |
| O43707 | ACTN4     | P08758 | ANXA5     | P41218 | MNDA      | Q86X76 | NIT1      |
| O43747 | AP1G1     | P08779 | K1C16     | P43251 | BTD       | Q8IZP0 | ABI1      |
| P35579 | MYH9      | P08865 | RSSA      | P43490 | NAMPT     | Q8N122 | RPTOR     |
| O43760 | SNG2      | P08962 | CD63      | P43652 | AFAM      | Q8N1N4 | K2C78     |
| O43768 | ENSA      | P09211 | GSTP1     | P46776 | RL27A     | Q8NE71 | ABCF1     |
| O43852 | CALU      | P09237 | MMP7      | P46781 | RS9       | Q8NFJ5 | RAI3      |
| O43866 | CD5L      | P09382 | LEG1      | P46782 | RS5       | Q8TDL5 | BPIB1     |
| O60218 | AK1BA     | P09429 | HMGB1     | P46940 | IQGA1     | Q8TE68 | ES8L1     |
| O60235 | TM11D     | P09467 | F16P1     | P47756 | CAPZB     | Q8TEA8 | DTD1      |
| O60361 | NDK8      | P09525 | ANXA4     | P47914 | RL29      | Q8WUM4 | PDC6I     |
| O60437 | PEPL      | P09651 | ROA1      | P47929 | LEG7      | Q8WVM8 | SCFD1     |
| O60635 | TSN1      | P09758 | TACD2     | P48594 | SPB4      | Q8WVV4 | POF1B     |
| O60664 | PLIN3     | P09871 | C1S       | P48637 | GSHB      | Q92597 | NDRG1     |
| O60701 | UGDH      | P09960 | LKHA4     | P48643 | TCPE      | Q92817 | EVPL      |
| O60784 | TOM1      | P09972 | ALDOC     | P48668 | K2C6C     | Q92820 | GGH       |
| O60814 | H2B1K     | P0C0L4 | CO4A      | P48735 | IDHP      | Q92876 | KLK6      |
| O60888 | CUTA      | P0C0L5 | CO4B      | P49006 | MRP       | Q92882 | OSTF1     |
| O75083 | WDR1      | P0CG05 | LAC2      | P49189 | AL9A1     | Q96AE4 | FUBP1     |
| O75223 | GGCT      | P0CG47 | UBB       | P49327 | FAS       | Q96C19 | EFHD2     |
| O75342 |           |        |           |        |           |        |           |

|        |       |        |       |        |       |        |       |
|--------|-------|--------|-------|--------|-------|--------|-------|
| O75347 | LX12B | P10153 | RNAS2 | P49368 | TCPG  | Q96DA0 | ZG16B |
| O75363 | TBCA  | P10412 | H14   | P49411 | EFTU  | Q96FQ6 | S10AG |
| O75367 | BCAS1 | P10451 | OSTP  | P49419 | AL7A1 | Q96FW1 | OTUB1 |
| O75368 | H2AY  | P10599 | THIO  | P49720 | PSB3  | Q96G03 | PGM2  |
| O75369 | SH3L1 | P10643 | CO7   | P49913 | CAMP  | Q96HC4 | PDLI5 |
| O75390 | FLNB  | P10696 | PPBN  | P50395 | GDIB  | Q96HE7 | ERO1A |
| O75531 | CISY  | P10809 | CH60  | P50452 | SPB8  | Q96KP4 | CNDP2 |
| O75556 | BAF   | P10909 | CLUS  | P50914 | RL14  | Q96P63 | SPB12 |
| O75594 | SG2A1 | P11021 | GRP78 | P50990 | TCPQ  | Q96PD5 | PGRP2 |
| O75629 | PGRP1 | P11142 | HSP7C | P50991 | TCPD  | Q96TA1 | NIBL1 |
| O75874 | CREG1 | P11215 | ITAM  | P50995 | ANX11 | Q99102 | MUC4  |
| O75882 | IDHC  | P11279 | LAMP1 | P51149 | RAB7A | Q99460 | PSMD1 |
| O76027 | ATRN  | P11413 | G6PD  | P51659 | DHB4  | Q99536 | VAT1  |
| O94919 | ANXA9 | P11586 | C1TC  | P51884 | LUM   | Q99623 | PHB2  |
| O95171 | ENDD1 | P12035 | K2C3  | P52209 | 6PGD  | Q99714 | HCD2  |
| O95274 | SCEL  | P12111 | CO6A3 | P52565 | GDIR1 | Q9BPY8 | HOP   |
| O95817 | LYPD3 | P12273 | PIP   | P52566 | GDIR2 | Q9BQE3 | TBA1C |
| O95833 | BAG3  | P12429 | ANXA3 | P52597 | HNRPF | Q9BQI0 | AIF1L |
| P00338 | CLIC3 | P12724 | ECP   | P52790 | HXK3  | Q9BQR3 | PRS27 |
| P00390 | LDHA  | P12814 | ACTN1 | P52907 | CAZA1 | Q9BRA2 | TXD17 |
| P00441 | GSHR  | P12830 | CADH1 | P52943 | CRIP2 | Q9BRF8 | CPPED |
| P00450 | SODC  | P12838 | DEF4  | P53004 | BIEA  | Q9BRP8 | WIBG  |
| P00491 | CERU  | P12956 | XRCC6 | P54108 | CRIS3 | Q9BW04 | SARG  |
| P00505 | PNPH  | P13010 | XRCC5 | P54652 | HSP72 | Q9C002 | NMES1 |
| P00558 | AATM  | P13473 | LAMP2 | P54727 | RD23B | Q9GZP8 | IMUP  |
| P00734 | PGK1  | P13489 | RINI  | P55058 | PLTP  | Q9GZX5 | ZN350 |
| P00736 | THRB  | P13639 | EF2   | P55072 | TERA  | Q9H0U4 | RAB1B |
| P00739 | C1R   | P13645 | K1C10 | P55145 | MANF  | Q9H161 | ALX4  |
| P00747 | HPTR  | P13646 | K1C13 | P55327 | TPD52 | Q9H1E1 | RNAS7 |
| P00748 | PLMN  | P13647 | K2C5  | P56134 | ATPK  | Q9H299 | SH3L3 |
| P00751 | FA12  | P13671 | CO6   | P59998 | ARPC4 | Q9H2G2 | SLK   |
| P00915 | CFAB  | P13796 | PLSL  | P60174 | TPIS  | Q9HC84 | MUC5B |
| P00918 | CAH1  | P13797 | PLST  | P60468 | SC61B | Q9HCY8 | S10AE |
| P01008 | CAH2  | P13861 | KAP2  | P60660 | MYL6  | Q9HD89 | RETN  |
| P01011 | ANT3  | P13987 | CD59  | P60709 | ACTB  | Q9HDC9 | APMAP |
| P01019 | AACT  | P14174 | MIF   | P60842 | IF4A1 | Q9NQ38 | ISK5  |
| P01024 | ANGT  | P14317 | HCLS1 | P60866 | RS20  | Q9NQC3 | RTN4  |
| P01031 | CO3   | P14618 | KPYM  | P60900 | PSA6  | Q9NRE2 | TSH2  |
| P01034 | CO5   | P14625 | ENPL  | P60903 | S10AA | Q9NVZ3 | NECP2 |
| P01037 | CYTC  | P14780 | MMP9  | P60953 | CDC42 | Q9NYU2 | UGGG1 |
| P01040 | CYTN  | P14868 | SYDC  | P60981 | DEST  | Q9NZD2 | GLTP  |
| P01042 | CYTA  | P14923 | PLAK  | P61019 | RAB2A | Q9NZT1 | CALL5 |
| P01106 | KNG1  | P15104 | GLNA  | P61026 | RAB10 | Q9P1F3 | ABRAL |
| P01266 | MYC   | P15311 | EZRI  | P61106 | RAB14 | Q9UBC9 | SPRR3 |
| P01591 | THYG  | P15428 | PGDH  | P61158 | ARP3  | Q9UBG3 | CRNN  |
| P01596 | IGJ   | P15924 | DESP  | P61160 | ARP2  | Q9UGL9 | CRCT1 |
| P01598 | KV104 | P15941 | MUC1  | P61163 | ACTZ  | Q9UGM3 | DMBT1 |
| P01603 | KV106 | P16070 | CD44  | P61604 | CH10  | Q9UHA7 | IL36A |

|        |       |        |       |        |       |        |       |
|--------|-------|--------|-------|--------|-------|--------|-------|
| P01609 | KV111 | P16152 | CBR1  | P61626 | LYSC  | Q9UIV8 | SPB13 |
| P01610 | KV117 | P16401 | H15   | P61769 | B2MG  | Q9UJ70 | NAGK  |
| P01612 | KV118 | P16402 | H13   | P61916 | NPC2  | Q9UJU6 | DBNL  |
| P01617 | KV120 | P16403 | H12   | P61978 | HNRPK | Q9UJY1 | HSPB8 |
| P01620 | KV204 | P16949 | STMN1 | P61981 | 1433G | Q9UK76 | HN1   |
| P01621 | KV302 | P16989 | YBOX3 | P62081 | RS7   | Q9UKR3 | KLK13 |
| P01622 | KV303 | P17096 | HMGA1 | P62158 | CALM  | Q9UL52 | TM11E |
| P01625 | KV304 | P17174 | AATC  | P62258 | 1433E | Q9ULC6 | PADI1 |
| P01765 | KV402 | P17213 | BPI   | P62263 | RS14  | Q9ULD9 | ZN608 |
| P01770 | HV304 | P17931 | LEG3  | P62266 | RS23  | Q9UM07 | PADI4 |
| P01781 | HV309 | P17936 | IBP3  | P62318 | SMD3  | Q9UN36 | NDRG2 |
| P01833 | HV320 | P17987 | TCPA  | P62328 | TYB4  | Q9UQ35 | SRRM2 |
| P02042 | PIGR  | P18054 | LOX12 | P62424 | RL7A  | Q9Y2P7 | ZN256 |
| P02511 | HBD   | P18065 | IBP2  | P62753 | RS6   | Q9Y2V2 | CHSP1 |
| P02533 | CRYAB | P18124 | RL7   | P62805 | H4    | Q9Y3Q3 | TMED3 |
| P02538 | K1C14 | P18135 | KV312 | P62826 | RAN   | Q9Y446 | PKP3  |
| P02545 | K2C6A | P18206 | VINC  | P62847 | RS24  | Q9Y490 | TLN1  |
| P02649 | LMNA  | P18510 | IL1RA | P62899 | RL31  | Q9Y4K1 | AIM1  |
| P02654 | APOE  | P18669 | PGAM1 | P62917 | RL8   | Q9Y5K6 | CD2AP |
| P02655 | APOC1 | P19012 | K1C15 | P62937 | PPIA  | Q9Y5Z4 | HEBP2 |
| P02656 | APOC2 | P19013 | K2C4  | P62942 | FKB1A | Q9Y6R7 | FCGBP |
| P02730 | APOC3 | P19367 | HXX1  | P62995 | TRA2B | Q5T0Z8 | CF132 |
| P02741 | B3AT  | P19823 | ITIH2 | P63104 | 1433Z |        |       |
| P02743 | CRP   | P19827 | ITIH1 | P63244 | GBLP  |        |       |
| P02746 | SAMP  | P19957 | ELAF  | P63261 | ACTG  |        |       |
| P02747 | C1QB  | P20061 | TCO1  | P63267 | ACTH  |        |       |
| P02748 | C1QC  | P20160 | CAP7  | P63313 | TYB10 |        |       |
| P02749 | CO9   | P20591 | MX1   | P67936 | TPM4  |        |       |
| P02750 | APOH  | P20618 | PSB1  | P68036 | UB2L3 |        |       |
| P02751 | A2GL  | P20700 | LMNB1 | P68104 | EF1A1 |        |       |
| P02753 | FINC  | P20810 | ICAL  | P68363 | TBA1B |        |       |
| P02760 | RET4  | P20930 | FILA  | P68366 | TBA4A |        |       |
| P02763 | AMBP  | P20962 | PTMS  | P68871 | HBB   |        |       |
| P02765 | A1AG1 | P21333 | FLNA  | P69905 | HBA   |        |       |
| P02766 | FETUA | P21926 | CD9   | P78371 | TCPB  |        |       |
| P02774 | TTHY  | P22234 | PUR6  | P80188 | NGAL  |        |       |
| P02788 | VTDB  | P22314 | UBA1  | P80511 | S10AC |        |       |
| P02790 | TRFL  | P22528 | SPR1B | P80723 | BASP1 |        |       |
| P03952 | HEMO  | P22626 | ROA2  | P83731 | RL24  |        |       |
| P03973 | KLKB1 | P22735 | TGM1  | P84098 | RL19  |        |       |
| P04003 | SLPI  | P22792 | CPN2  | P98160 | PGBM  |        |       |
| P04004 | C4BPA | P22894 | MMP8  | Q00325 | MPCP  |        |       |
| P04040 | VTNC  | P23142 | FBLN1 | Q00610 | CLH1  |        |       |
| P04075 | CATA  | P23246 | SFPQ  | Q00796 | DHSO  |        |       |
| P04080 | ALDOA | P23284 | PPIB  | Q00839 | HNRPU |        |       |
| P04083 | CYTB  | P23381 | SYWC  | Q01469 | FABP5 |        |       |
| P04114 | ANXA1 | P23396 | RS3   | Q01518 | CAP1  |        |       |
| P04179 | APOB  | P23526 | SAHH  | Q01844 | EWS   |        |       |



|        |       |        |       |        |       |  |  |
|--------|-------|--------|-------|--------|-------|--|--|
| P04196 | SODM  | P23528 | COF1  | Q02413 | DSG1  |  |  |
| P04207 | HRG   | P24158 | PRTN3 | Q02487 | DSC2  |  |  |
| P04208 | KV308 | P25205 | MCM3  | Q02878 | RL6   |  |  |
| P04217 | LV106 | P25311 | ZA2G  | Q02978 | M2OM  |  |  |
| P04220 | A1BG  | P25705 | ATPA  | Q04695 | K1C17 |  |  |
| P04259 | MUCB  | P25787 | PSA2  | Q04837 | SSBP  |  |  |
| P04264 | K2C6B | P25788 | PSA3  | Q04917 | 1433F |  |  |
| P04275 | K2C1  | P25789 | PSA4  | Q05315 | LEG10 |  |  |
| P04406 | VWF   | P25815 | S100P | Q06033 | ITIH3 |  |  |
| P04434 | G3P   | P26038 | MOES  | Q06323 | PSME1 |  |  |
| P04632 | KV310 | P26373 | RL13  | Q06830 | PRDX1 |  |  |
| P04792 | CPNS1 | P26583 | HMGB2 | Q07020 | RL18  |  |  |
| P04839 | HSPB1 | P26641 | EF1G  | Q07654 | TFF3  |  |  |
| P04899 | CY24B | P27105 | STOM  | Q07812 | BAX   |  |  |
| P04908 | GNAI2 | P27169 | PON1  | Q08188 | TGM3  |  |  |
| P05089 | H2A1B | P27348 | 1433T | Q08380 | LG3BP |  |  |
| P05090 | ARGI1 | P27482 | CALL3 | Q09666 | AHNK  |  |  |
| P05107 | APOD  | P27797 | CALR  | Q12802 | AKP13 |  |  |
| P05109 | ITB2  | P27816 | MAP4  | Q12841 | FSTL1 |  |  |
| P05120 | S10A8 | P27824 | CALX  | Q13011 | ECH1  |  |  |
| P05141 | PAI2  | P28066 | PSA5  | Q13126 | MTAP  |  |  |
| P05155 | ADT2  | P28072 | PSB6  | Q13228 | SBP1  |  |  |
| P05156 | IC1   | P28074 | PSB5  | Q13442 | HAP28 |  |  |
| P05160 | CFAI  | P28838 | AMPL  | Q13510 | ASAH1 |  |  |
| P05164 | F13B  | P29373 | RABP2 | Q13751 | LAMB3 |  |  |
| P05187 | PERM  | P29401 | TKT   | Q13813 | SPTN1 |  |  |
| P05386 | PPB1  | P29508 | SPB3  | Q13835 | PKP1  |  |  |
| P05387 | RLA1  | P29622 | KAIN  | Q13867 | BLMH  |  |  |
| P05543 | RLA2  | P29692 | EF1D  | Q14002 | CEAM7 |  |  |
| P05546 | THBG  | P29966 | MARCS | Q14019 | COTL1 |  |  |
| P05556 | HEP2  | P30041 | PRDX6 | Q14103 | HNRPD |  |  |
| P05783 | ITB1  | P30043 | BLVRB | Q14134 | TRI29 |  |  |
| P05787 | K1C18 | P30044 | PRDX5 | Q14152 | EIF3A |  |  |
| P06311 | K2C8  | P30048 | PRDX3 | Q14210 | LY6D  |  |  |
| P06396 | KV311 | P30050 | RL12  | Q14247 | SRC8  |  |  |
| P06454 | GELS  | P30085 | KCY   | Q14508 | WFDC2 |  |  |
| P06576 | PTMA  | P30086 | PEBP1 | Q14624 | ITIH4 |  |  |
| P06681 | ATPB  | P30101 | PDIA3 | Q14697 | GANAB |  |  |
| P06702 | CO2   | P30153 | 2AAA  | Q14764 | MVP   |  |  |
| P06727 | S10A9 | P30740 | ILEU  | Q14974 | IMB1  |  |  |
| P06731 | APOA4 | P31146 | COR1A | Q14CN2 | CLCA4 |  |  |
| P06733 | CEAM5 | P31151 | S10A7 | Q15084 | PDIA6 |  |  |
| P06737 | ENOA  | P31930 | QCR1  | Q15149 | PLEC  |  |  |
| P06744 | PYGL  | P31944 | CASPE | Q15181 | IPYR  |  |  |
| P06748 | G6PI  | P31946 | 1433B | Q15365 | PCBP1 |  |  |
| P06753 | NPM   | P31947 | 1433S | Q15393 | SF3B3 |  |  |
| P06889 | TPM3  | P31949 | S10AB | Q15582 | BGH3  |  |  |
| P07099 | LV405 | P31997 | CEAM8 | Q15843 | NEDD8 |  |  |

|                         |       |        |       |        |       |  |  |
|-------------------------|-------|--------|-------|--------|-------|--|--|
| Biomarker               |       |        |       |        |       |  |  |
| 1/sp A8K2U0 A2ML1_HUMAN |       |        |       |        |       |  |  |
| 1/sp O60235 TM11D_HUMAN |       |        |       |        |       |  |  |
| 1/sp O75223 GGCT_HUMAN  |       |        |       |        |       |  |  |
| 1/sp P00450 CERU_HUMAN  |       |        |       |        |       |  |  |
| 1/sp P00734 THRB_HUMAN  |       |        |       |        |       |  |  |
| 1/sp P00751 CFAB_HUMAN  |       |        |       |        |       |  |  |
| 1/sp P01008 ANT3_HUMAN  |       |        |       |        |       |  |  |
| 1/sp P01011 AACT_HUMAN  |       |        |       |        |       |  |  |
| 1/sp P01019 ANGT_HUMAN  |       |        |       |        |       |  |  |
| 1/sp P01024 CO3_HUMAN   |       |        |       |        |       |  |  |
| 1/sp P01031 CO5_HUMAN   |       |        |       |        |       |  |  |
| 1/sp P01040 CYTA_HUMAN  |       |        |       |        |       |  |  |
| 1/sp P01042 KNG1_HUMAN  |       |        |       |        |       |  |  |
| 1/sp P02042 HBD_HUMAN   |       |        |       |        |       |  |  |
| 1/sp P02533 K1C14_HUMAN |       |        |       |        |       |  |  |
| P07108                  | HYEP  | P32119 | PRDX2 | Q15847 | ADIRF |  |  |
| P07195                  | ACBP  | P32320 | CDD   | Q16186 | ADRM1 |  |  |
| P07225                  | LDHB  | P32926 | DSG3  | Q16610 | ECM1  |  |  |
| P07237                  | PROS  | P34932 | HSP74 | Q16658 | FSCN1 |  |  |
| P07339                  | PDIA1 | P35221 | CTNA1 | Q16698 | DECR  |  |  |
| P07355                  | CATD  | P35237 | SPB6  | Q16831 | UPP1  |  |  |
| P07357                  | ANXA2 | P35268 | RL22  | Q16851 | UGPA  |  |  |
| P07358                  | CO8A  | P35321 | SPR1A | Q32MZ4 | LRRF1 |  |  |
| P07360                  | CO8B  | P35326 | SPR2A | Q53FA7 | QORX  |  |  |
|                         | CO8G  | P35527 | K1C9  | Q5D862 | FILA2 |  |  |

**Table S3:** Differentially expressed proteins between the five cancers and five controls used for library validation.

|                         |
|-------------------------|
| 1/sp P02649 APOE_HUMAN  |
| 1/sp P02654 APOC1_HUMAN |
| 1/sp P02743 SAMP_HUMAN  |
| 1/sp P02746 C1QB_HUMAN  |
| 1/sp P02747 C1QC_HUMAN  |
| 1/sp P02748 CO9_HUMAN   |
| 1/sp P02751 FINC_HUMAN  |
| 1/sp P02753 RET4_HUMAN  |
| 1/sp P02760 AMBP_HUMAN  |
| 1/sp P02763 A1AG1_HUMAN |
| 1/sp P02766 TTHY_HUMAN  |
| 1/sp P02774 VTDB_HUMAN  |
| 1/sp P02790 HEMO_HUMAN  |
| 1/sp P04003 C4BPA_HUMAN |
| 1/sp P04004 VTNC_HUMAN  |
| 1/sp P04114 APOB_HUMAN  |
| 1/sp P04196 HRG_HUMAN   |
| 1/sp P04217 A1BG_HUMAN  |
| 1/sp P05090 APOD_HUMAN  |
| 1/sp P05109 S10A8_HUMAN |
| 1/sp P05156 CFAI_HUMAN  |
| 1/sp P05543 THBG_HUMAN  |
| 1/sp P05546 HEP2_HUMAN  |
| 1/sp P06727 APOA4_HUMAN |
| 1/sp P06731 CEAM5_HUMAN |
| 1/sp P07225 PROS_HUMAN  |
| 1/sp P07355 ANXA2_HUMAN |
| 1/sp P07360 CO8G_HUMAN  |
| 1/sp P08185 CBG_HUMAN   |
| 1/sp P08603 CFAH_HUMAN  |

|                         |
|-------------------------|
| 1/sp P08697 A2AP_HUMAN  |
| 1/sp P10643 CO7_HUMAN   |
| 1/sp P10909 CLUS_HUMAN  |
| 1/sp P11142 HSP7C_HUMAN |
| 1/sp P13671 CO6_HUMAN   |
| 1/sp P19823 ITI2_HUMAN  |

|                         |
|-------------------------|
| 1/sp P19827 ITIH1_HUMAN |
| 1/sp P22735 TGM1_HUMAN  |
| 1/sp P22792 CPN2_HUMAN  |
| 1/sp P27169 PON1_HUMAN  |
| 1/sp P29622 KAIN_HUMAN  |
| 1/sp P30740 ILEU_HUMAN  |
| 1/sp P31151 S10A7_HUMAN |
| 1/sp P32926 DSG3_HUMAN  |
| 1/sp P43251 BTD_HUMAN   |

|                         |
|-------------------------|
| 1/sp P43652 AFAM_HUMAN  |
| 1/sp P49913 CAMP_HUMAN  |
| 1/sp P51884 LUM_HUMAN   |
| 1/sp P55058 PLTP_HUMAN  |
| 1/sp P62805 H4_HUMAN    |
| 1/sp P68871 HBB_HUMAN   |
| 1/sp P69905 HBA_HUMAN   |
| 1/sp P80188 NGAL_HUMAN  |
| 1/sp Q01469 FABP5_HUMAN |
| 1/sp Q08188 TGM3_HUMAN  |
| 1/sp Q08380 LG3BP_HUMAN |
| 1/sp Q14134 TRI29_HUMAN |
| 1/sp Q14210 LY6D_HUMAN  |
| 1/sp Q14624 ITIH4_HUMAN |
| 1/sp Q6P4A8 PLBL1_HUMAN |

|                         |
|-------------------------|
| 1/sp Q8TEA8 DTD1_HUMAN  |
| 1/sp Q92876 KLK6_HUMAN  |
| 1/sp Q96PD5 PGRP2_HUMAN |
| 1/sp Q9UIV8 SPB13_HUMAN |
| 1/sp Q9UKR3 KLK13_HUMAN |

**Table S4:** Previously reported endometrial cancer biomarker candidates captured in the cervico-vaginal fluid consensus spectral library

| Protein                     | Uniprot ID |
|-----------------------------|------------|
| Adiponectin                 | Q15848     |
| Alpha-1-acid glycoprotein 1 | P02763     |
| Alpha-1-antitrypsin         | P01009     |
| Alpha-1B-glycoprotein       | P04217     |
| Alpha-enolase               | P06733     |
| Annexin A11                 | P50995     |
| Annexin A3                  | P12429     |

|                                                                    |        |
|--------------------------------------------------------------------|--------|
| Annexin A4                                                         | P09525 |
| Annexin A5                                                         | P08758 |
| Annexin A8                                                         | P13928 |
| Antithrombin-III                                                   | P01008 |
| Apolipoprotein A-IV                                                | P06727 |
| Apolipoprotein C-III                                               | P02656 |
| Apolipoprotein L1                                                  | O14791 |
| Calreticulin                                                       | P27797 |
| Complement C2                                                      | P06681 |
| Complement C5                                                      | P01031 |
| Costars family protein ABRAC                                       | Q9P1F3 |
| Creatine kinase B-type                                             | P12277 |
| Creatine kinase U-type, mitochondrial                              | P12532 |
| Epidermal growth factor receptor kinase substrate 8-like protein 2 | Q9H6S3 |
| Fatty acid synthase                                                | P49327 |
| Fatty acid-binding protein 5                                       | Q01469 |
| Fatty acid-binding protein, adipocyte                              | P15090 |
| Fibrinogen beta chain                                              | P02675 |
| Heat shock 70 kDa protein 4                                        | P34932 |
| Heat shock cognate 71 kDa protein                                  | P11142 |
| Heat shock protein 10 kDa, mitochondrial                           | P61604 |
| Heat shock protein 60 kDa, mitochondrial                           | P10809 |
| Heat shock protein 75 kDa, mitochondrial                           | Q12931 |
| Heat shock-related 70 kDa protein 2                                | P54652 |
| Heterogeneous nuclear ribonucleoprotein K                          | P61978 |
| Hsp90 co-chaperone Cdc37                                           | Q16543 |
| Insulin-like growth factor-binding protein 3                       | P17936 |
| Leucine-rich alpha-2-glycoprotein                                  | P02750 |
| L-lactate dehydrogenase B chain                                    | P07195 |
| Matrix metalloproteinase-25                                        | Q9NPA2 |
| Matrix metalloproteinase-9                                         | P14780 |
| Metalloproteinase inhibitor 1                                      | P01033 |
| Mucin-1                                                            | P15941 |
| Mucin-21                                                           | Q5SSG8 |
| Mucin-4                                                            | Q99102 |
| Mucin-5AC                                                          | P98088 |
| Mucin-5B                                                           | Q9HC84 |
| Phosphoglycerate mutase 1                                          | P18669 |
| Pro-cathepsin H                                                    | P09668 |
| Prohibitin                                                         | P35232 |
| Protein S100-A9                                                    | P06702 |
| Putative fatty acid-binding protein 5-like protein 3               | A8MUU1 |
| Pyruvate kinase                                                    | P14618 |
| Serotransferrin                                                    | P02787 |
| Serum amyloid A-4 protein                                          | P35542 |
| Stress-induced-phosphoprotein 1                                    | P31948 |
| Superoxide dismutase (Cu-Zn)                                       | P00441 |
| Superoxide dismutase (Mn), mitochondrial                           | P04179 |
| Transgelin-2                                                       | P37802 |
| Transthyretin                                                      | P02766 |
| WAP four-disulfide core domain protein 2                           | Q14508 |

**Table S5:** Tumour related proteins captured in the cervico-vaginal fluid consensus spectral library.

| Protein                                  | Uniprot ID |
|------------------------------------------|------------|
| Apoptosis regulator BAX                  | Q07812     |
| BH3-interacting domain death agonist     | P55957     |
| Breast carcinoma-amplified sequence 1    | O75363     |
| Cell division control protein 42 homolog | P60953     |

|                                             |        |
|---------------------------------------------|--------|
| DNA replication licensing factor MCM5       | P33992 |
| DNA replication licensing factor MCM6       | Q14566 |
| DNA replication licensing factor MCM7       | P33993 |
| Hypermethylated in cancer 2 protein         | Q96JB3 |
| Hypoxia up-regulated protein 1              | Q9Y4L1 |
| Migration and invasion enhancer 1           | Q9BRT3 |
| Myc proto-oncogene protein                  | P01106 |
| Programmed cell death 6-interacting protein | Q8WUM4 |
| Programmed cell death protein 10            | Q9BUL8 |
| Programmed cell death protein 6             | O75340 |
| Prolactin-inducible protein                 | P12273 |
| Proliferation-associated protein 2G4        | Q9UQ80 |
| Protein FAM3C                               | Q92520 |
| Proto-oncogene c-Rel                        | Q04864 |
| Ras-related protein Rab-5C                  | P51148 |
| Translationally-controlled tumor protein    | P13693 |
| Tumor protein D52                           | P55327 |
| Tumor protein D54                           | O43399 |
| Tumor protein p73                           | O15350 |
